# Supplementary material for: Effect of Cold Atmospheric Pressure Argon Plasma Jet Treatment on the Freeze-Dried Mucilage of Chia Seeds (Salvia hispanica L.)
Source: MDPI journal article supplement (doi:10.3390/foods12081563), 2023-04-07
Supplement: s1 [file s1]

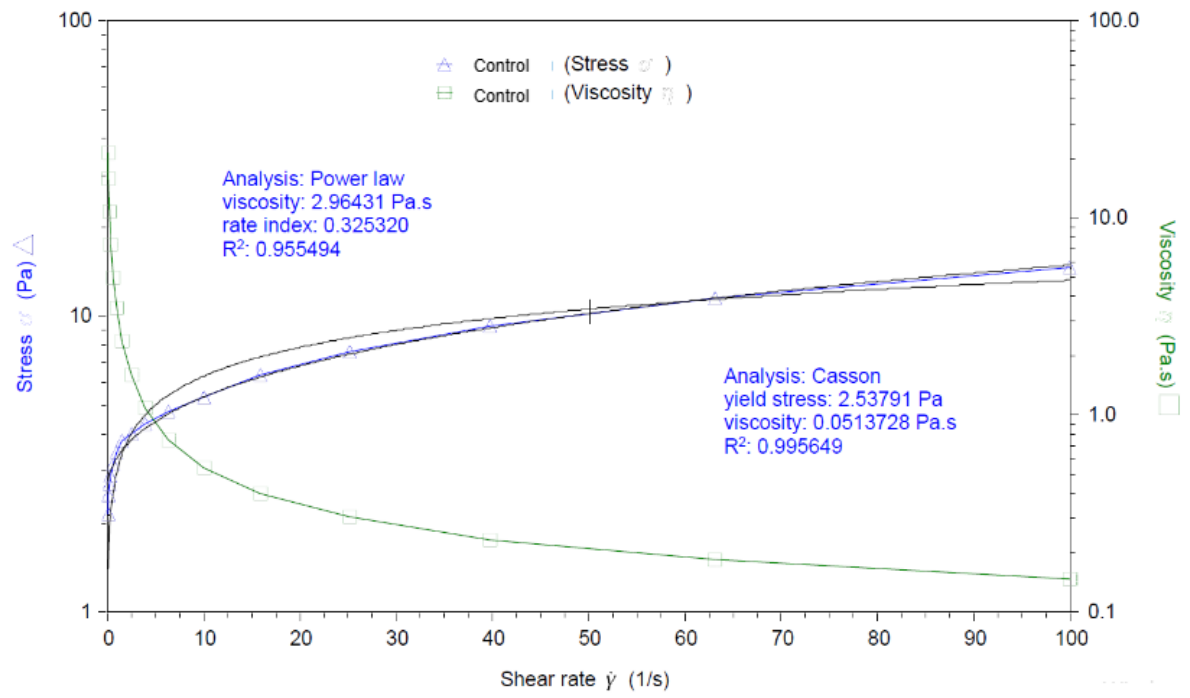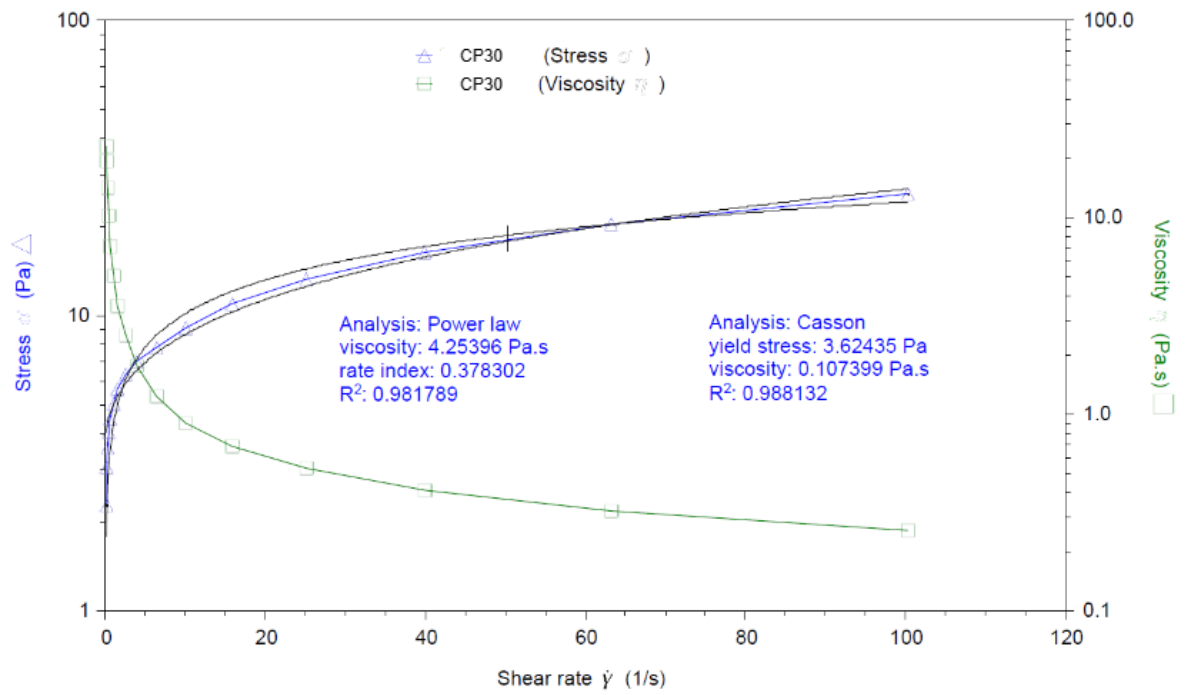

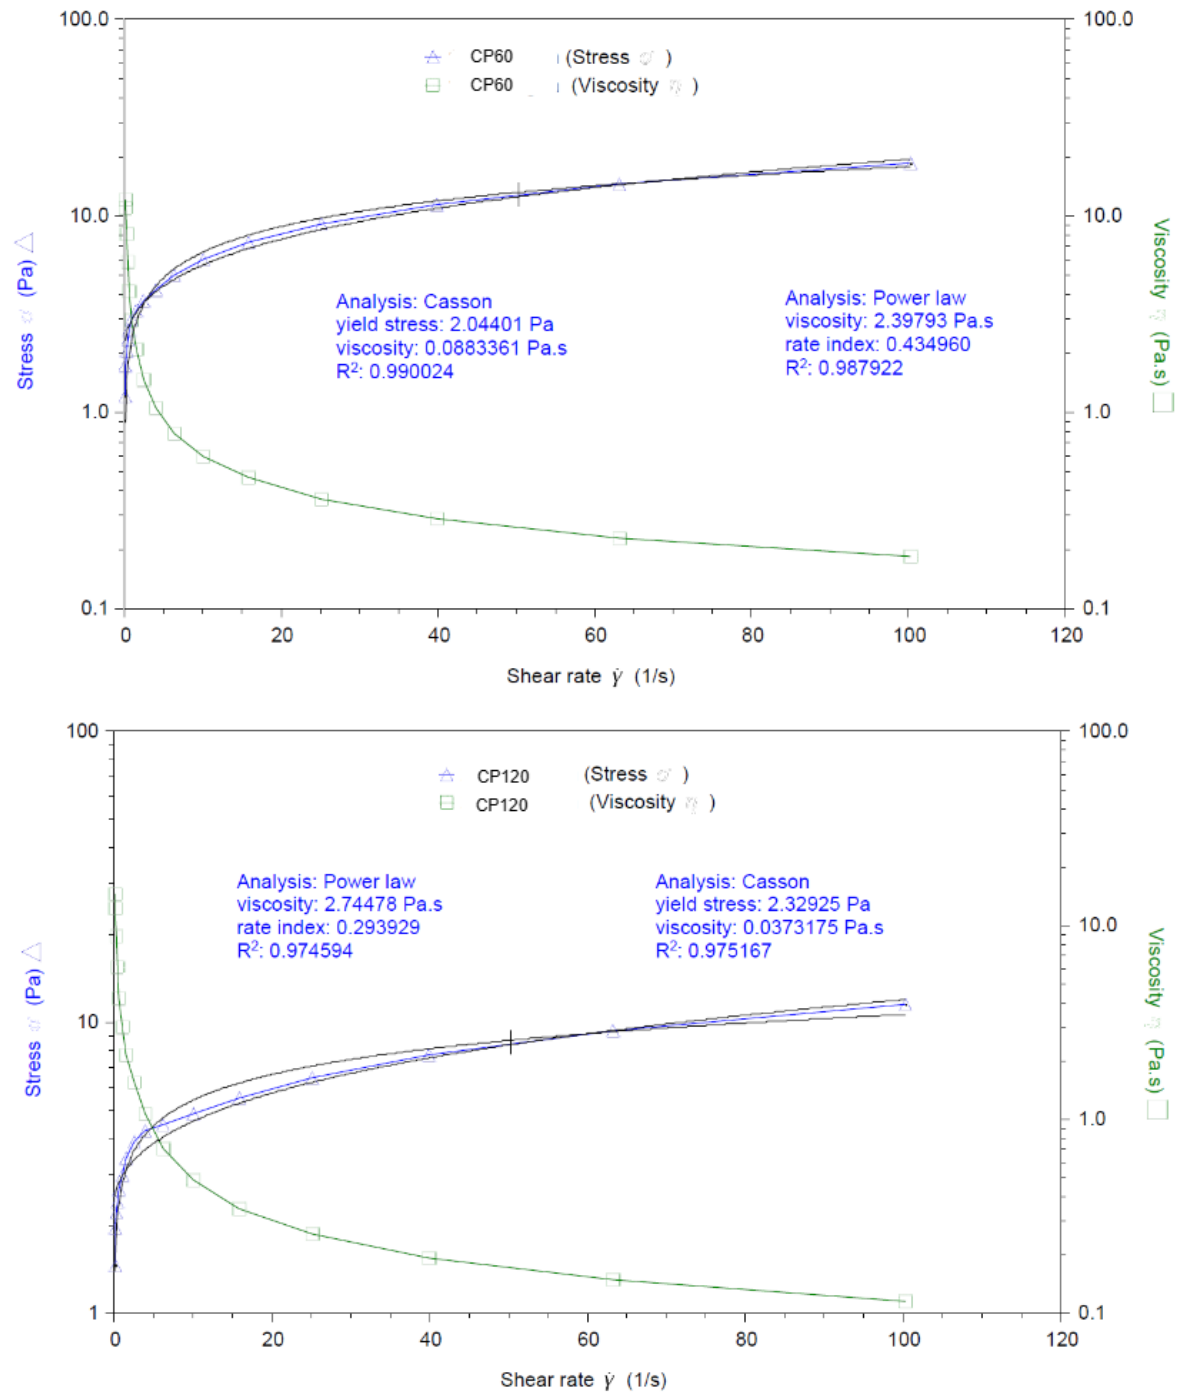

Figure S1. Flow curve data of 1% (w/v) gels of mucilage samples from untreated (control) and CP-treated chia seeds for Power-law and Casson rheological models.
